# Supplementary material for: Common Genetic Variants Explain the Majority of the Correlation Between Height and Intelligence: The Generation Scotland Study
Source: PubMed Central journal article supplement (PMC3938855; doi:10.1007/s10519-014-9644-z), 2014-02-20
Supplement: 10519_2014_9644_MOESM1_ESM.pdf [file 10519_2014_9644_MOESM1_ESM.pdf]

Supplementary Table I: Age-, sex-, and population stratification-adjusted univariate GCTA models for cognition and height.

|        | n     | V(G)   | SE    | V(e)   | SE    | Vp     | SE    | V(G)/Vp | SE    |
|--------|-------|--------|-------|--------|-------|--------|-------|---------|-------|
| g      | 6,609 | 0.269  | 0.052 | 0.685  | 0.051 | 0.954  | 0.017 | 0.282   | 0.054 |
| Height | 6,792 | 22.903 | 2.194 | 16.836 | 2.048 | 39.739 | 0.694 | 0.576   | 0.052 |

g: general intelligence derived from principal components analysis.

V(G): genetic variance, V(e): residual variance, Vp: phenotypic variance, V(G)/Vp: ratio of genetic variance to phenotypic variance.

Supplementary Table II: Age-, sex-, and population stratification-adjusted bivariate GCTA model of cognition and height.

|        | n      | V(G) <sub>tr1</sub> | SE    | V(G) <sub>tr2</sub> | SE    | C(G) <sub>tr12</sub> | SE    | V(e) <sub>tr1</sub> | SE    | V(e) <sub>tr2</sub> | SE    | C(e) <sub>tr12</sub> | SE    | V <sub>p</sub> tr1 | SE    | V <sub>p</sub> tr2 | SE    | V(G)/V <sub>p</sub> tr1 | SE    | V(G)/V <sub>p</sub> tr2 | SE    | r <sub>G</sub> | SE    |  |
|--------|--------|---------------------|-------|---------------------|-------|----------------------|-------|---------------------|-------|---------------------|-------|----------------------|-------|--------------------|-------|--------------------|-------|-------------------------|-------|-------------------------|-------|----------------|-------|--|
| g :    | 6,609: |                     |       |                     |       |                      |       |                     |       |                     |       |                      |       |                    |       |                    |       |                         |       |                         |       |                |       |  |
| Height | 6,792  | 0.264               | 0.052 | 22.878              | 2.194 | 0.682                | 0.242 | 0.690               | 0.052 | 16.859              | 2.048 | 0.285                | 0.233 | 0.954              | 0.017 | 39.737             | 0.694 | 0.277                   | 0.054 | 0.576                   | 0.052 | 0.277          | 0.095 |  |

g: general intelligence derived from principal components analysis.

V(G)<sub>tri</sub>: genetic variance for trait *i*, V(e)<sub>tri</sub>: residual variance for trait *i*, V<sub>p</sub>tr<sub>i</sub>: phenotypic variance for trait *i*, V(G)/V<sub>p</sub>tr<sub>i</sub>: ratio of genetic variance to phenotypic variance for trait *i*, C(G)<sub>tri</sub>: genetic covariance for trait *i*, C(e)<sub>tri</sub>: residual covariance for trait *i*, r<sub>G</sub>: genetic correlation.

Bivariate heritability was calculated as  $C(G)_{tr12} / (C(G)_{tr12} + C(e)_{tr12})$

## Supplementary Figures

Supplementary Figure 1: Comparison of log-Likelihoods and residual errors for linear regression models of age-, sex-, and population stratification (up to 20 principal components)-adjusted cognition and height.
