# Supplementary material for: Common Genetic Variants Explain the Majority of the Correlation Between Height and Intelligence: The Generation Scotland Study
Source: PubMed Central journal article supplement (PMC3938855; doi:10.1007/s10519-014-9644-z), 2014-02-20

**g**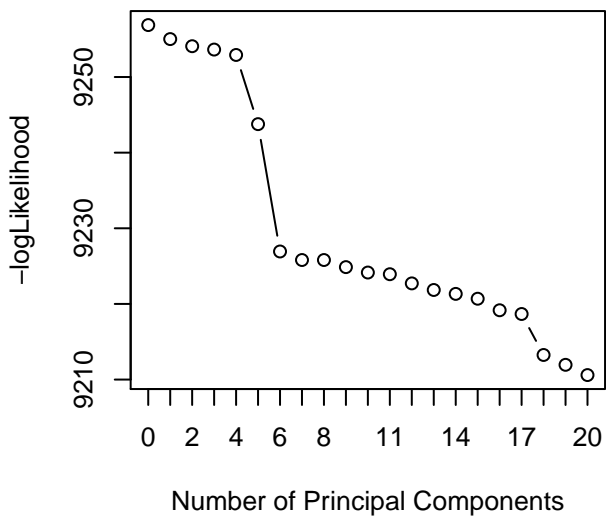**g**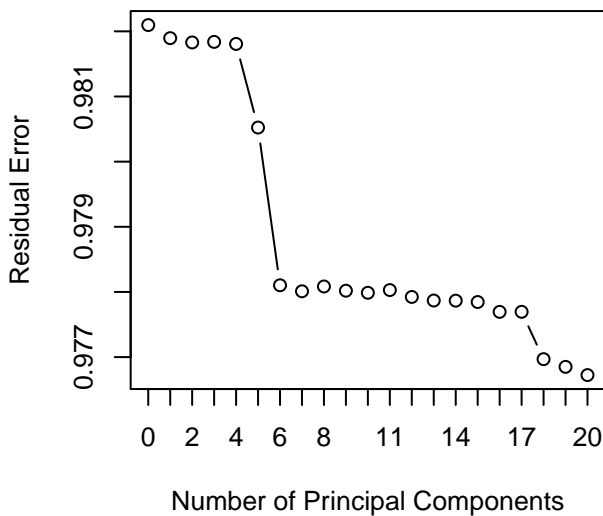**Height**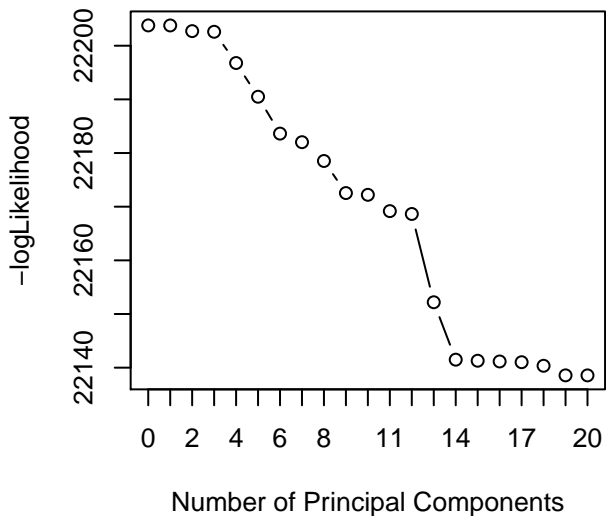**Height**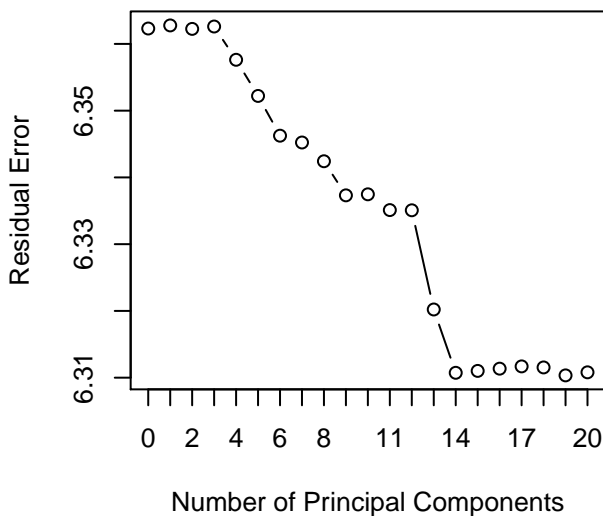

Supplement: 10519_2014_9644_MOESM2_ESM.pdf [file 10519_2014_9644_MOESM2_ESM.pdf]
